# Supplementary material for: Electrochemical Sensitivity Improvement by the Cooperation between Pt and Ru for Total Antioxidant Evaluation in Natural Extracts
Source: MDPI journal article supplement (doi:10.3390/chemosensors11060314), 2023-05-23
Supplement: s1 [file s1]

Archive with 1 entries (1 files):
- chemosensors-2316521-supplementary.pdf
