# Supplementary material for: Electrochemical Sensitivity Improvement by the Cooperation between Pt and Ru for Total Antioxidant Evaluation in Natural Extracts
Source: MDPI journal article supplement (doi:10.3390/chemosensors11060314), 2023-05-23
Supplement: s1 [file s1 › chemosensors-2316521-supplementary.pdf]

## Supporting Material

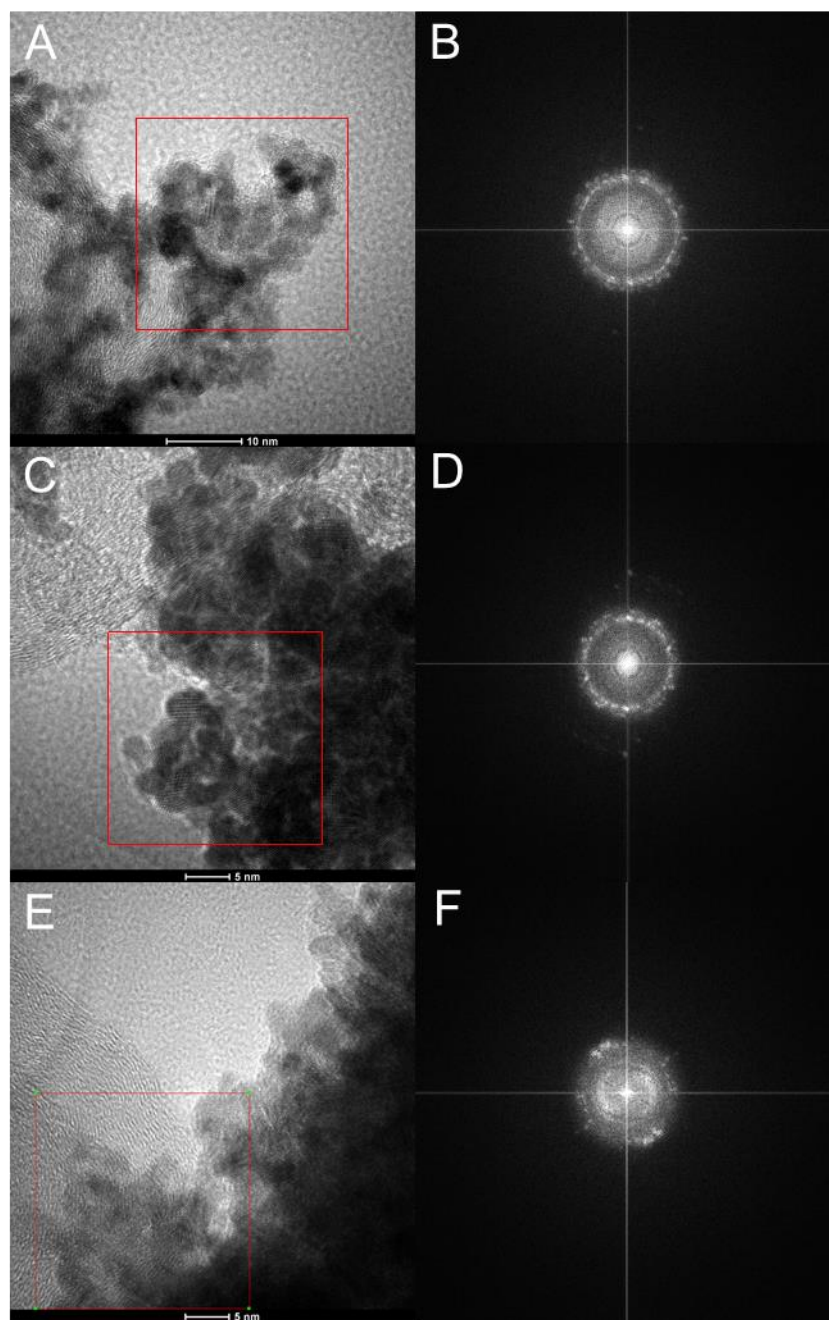

**Figure S1.** TEM and selected area electron diffraction of (A, B) Pt/C, (D, E) Pt<sub>80</sub>Ru<sub>20</sub>/C, and (G, H) Pt<sub>60</sub>Ru<sub>40</sub>/C electrocatalysts.

**Table S1.** Particle size obtained by the Scherrer equation.

| Sample                                 | Tamanho do cristalito (nm) |
|----------------------------------------|----------------------------|
| Pt/C                                   | 3.2                        |
| Pt <sub>80</sub> %Ru <sub>20</sub> %/C | 3.4                        |
| Pt <sub>60</sub> %Ru <sub>40</sub> %/C | 2.3                        |
